# Supplementary material for: CdSe QDs@UIO-66 composite with enhanced photocatalytic activity towards RhB degradation under visible-light irradiation
Source: Royal Society of Chemistry journal article supplement (doi:10.1039/c5ra23565k), 2016-01-01
Supplement: c5ra23565k1.pdf [file c5ra23565k1.pdf]

## Supporting information

### **CdSe QDs @ UIO-66 composite with enhanced photocatalytic activity towards RhB degradation under visible-light irradiation**

Haijun Gan, Zhen Wang, Huimin, Li, Yuanrui Wang, Linping Sun, Yafeng Li\*

School of Chemical Engineering, Changchun University of Technology, 130012, Changchun, P. R. China

Fax: 86-0431-85716785

E-mail: [liyafeng@ccut.edu.cn](mailto:liyafeng@ccut.edu.cn)

Fig.S1 N<sub>2</sub> isothermal adsorption at 77K. (⊙) UIO-66; (●) CdSe QDs @ UIO-66-0.05; (◆) CdSe QDs @ UIO-66-0.1; (□) CdSe QDs @ UIO-66-0.2; (⊙) CdSe QDs @ UIO-66-0.4.

Fig.S2. Plots of  $(\alpha h\nu)^2$  versus energy ( $h\nu$ ) to obtain the band gap energy of different catalyst samples. a. Pure UIO-66; b. Pure CdSe; c. CdSe QDs @ UIO-66-0.05; d. CdSe QDs @ UIO-66-0.1; e. CdSe QDs @ UIO-66-0.2; f. CdSe QDs @ UIO-66-0.4.

Fig.S3 Comparison of the reaction rate constant ( $k$ ) in the presence of different catalysts according to the pseudo-first-order kinetic model. (●) CdSe QDs @ UIO-66-0.4,  $Y=0.0639x-0.0576$ ,  $R^2=0.972$ ; (◆) CdSe QDs @ UIO-66-0.2,  $Y=0.0557x-0.0104$ ,  $R^2=0.990$ ; (●) CdSe QDs @ UIO-66-0.1,  $Y=0.0489x-0.0799$ ,  $R^2=0.969$ ; (⊙) CdSe QDs @ UIO-66-0.05,  $Y=0.0309x+0.102$ ,  $R^2=0.978$ ; (X) the control experiment,  $Y=0.0219x+0.118$ ,  $R^2=0.943$ .

Fig.S4 PXRD patterns of as-synthesized and reacted CdSe QDs @UIO-66-0.2.

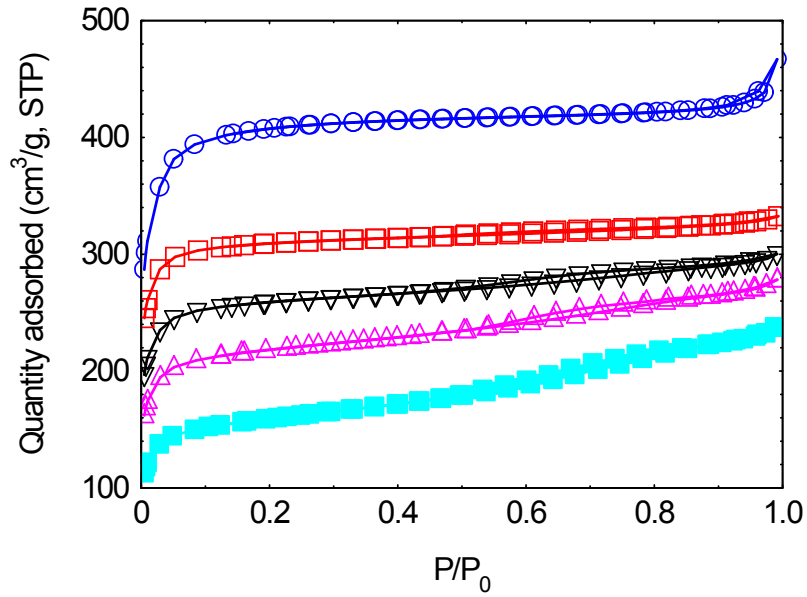

Fig.S1 N<sub>2</sub> isothermal adsorption at 77K. (○) UIO-66; (●) CdSe QDs @ UIO-66-0.05; (◆) CdSe QDs @ UIO-66-0.1; (□) CdSe QDs @ UIO-66-0.2; (○) CdSe QDs @ UIO-66-0.4.

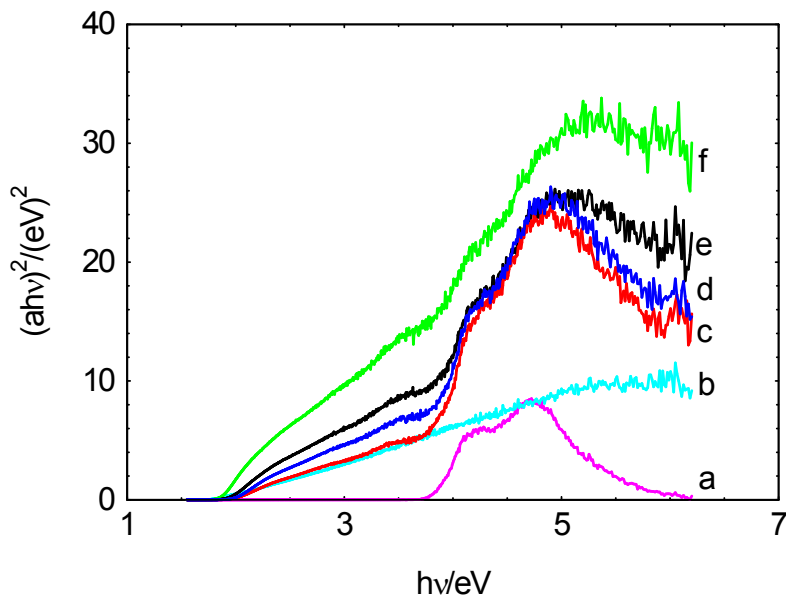

Fig.S2. Plots of  $(\alpha h\nu)^2$  versus energy ( $h\nu$ ) to obtain the band gap energy of different catalyst samples. a. Pure UIO-66; b. Pure CdSe; c. CdSe QDs @ UIO-66-0.05; d. CdSe QDs @ UIO-66-0.1; e. CdSe QDs @ UIO-66-0.2; f. CdSe QDs @ UIO-66-0.4.

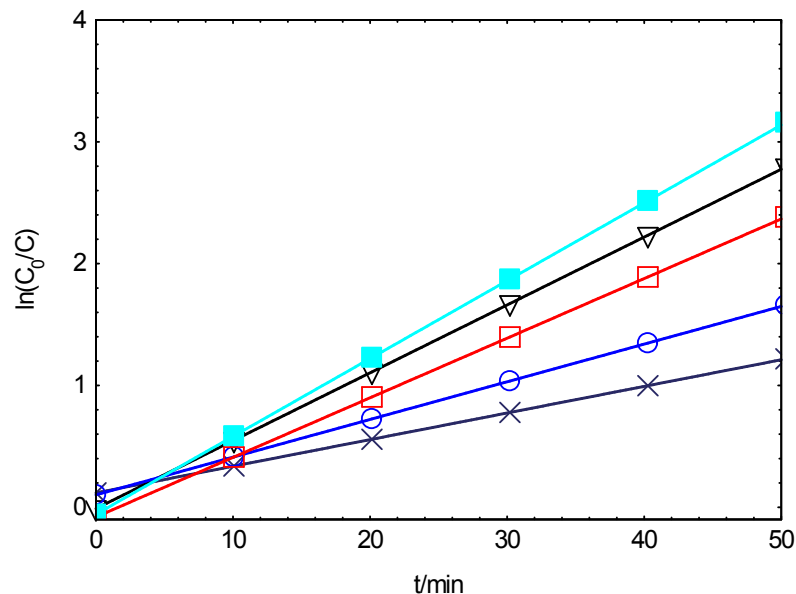

Fig.S3 Comparison of the reaction rate constant ( $k$ ) in the presence of different catalysts according to the pseudo-first-order kinetic model. (●) CdSe QDs @ UIO-66-0.4,  $Y=0.0639x-0.0576$ ,  $R^2=0.972$ ; (♦) CdSe QDs @ UIO-66-0.2,  $Y=0.0557x-0.0104$ ,  $R^2=0.990$ ; (●) CdSe QDs @ UIO-66-0.1,  $Y=0.0489x-0.0799$ ,  $R^2=0.969$ ; (⊙) CdSe QDs @ UIO-66-0.05,  $Y=0.0309x+0.102$ ,  $R^2=0.978$ ; (X) the control experiment,  $Y=0.0219x+0.118$ ,  $R^2=0.943$ .

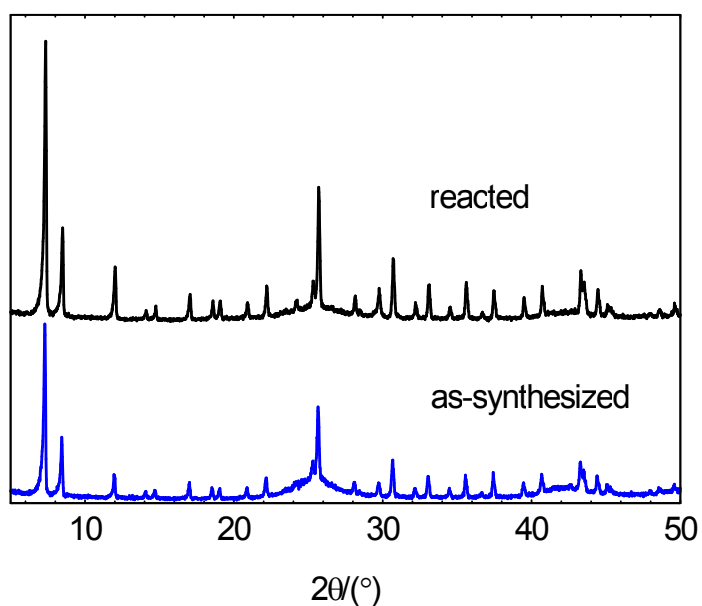

Fig.S4 PXRD patterns of as-synthesized and reacted CdSe QDs @ UIO-66-0.2.
